# Supplementary material for: Facile Pretreatment of Three-Dimensional Graphene through Electrochemical Polarization for Improved Electrocatalytic Performance and Simultaneous Electrochemical Detection of Catechol and Hydroquinone
Source: MDPI journal article supplement (doi:10.3390/nano12010065), 2021-12-27
Supplement: s1 [file s1]

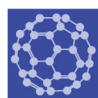

Supplementary Materials

# Facile Pretreatment of Three-Dimensional Graphene through Electrochemical Polarization for Improved Electrocatalytic Performance and Simultaneous Electrochemical Detection of Catechol and Hydroquinone

Huaxu Zhou <sup>1,2</sup>, Guotao Dong <sup>2,\*</sup>, Ajabkhan Sailjoi <sup>1</sup> and Jiyang Liu <sup>1,\*</sup>

<sup>1</sup> Key Laboratory of Surface & Interface Science of Polymer Materials of Zhejiang Province, Department of Chemistry, Zhejiang Sci-Tech University, Hangzhou 310018, China; chemist1996@126.com (H.Z.); ajabkhan@163.com (A.S.)

<sup>2</sup> Heihe Water Resources and Ecological Protection Research Center, Lanzhou, 730030, China

\* Correspondence: dongguotao@hglj.yrcc.gov.cn (G.D.); liujyxx@126.com (J.L.)

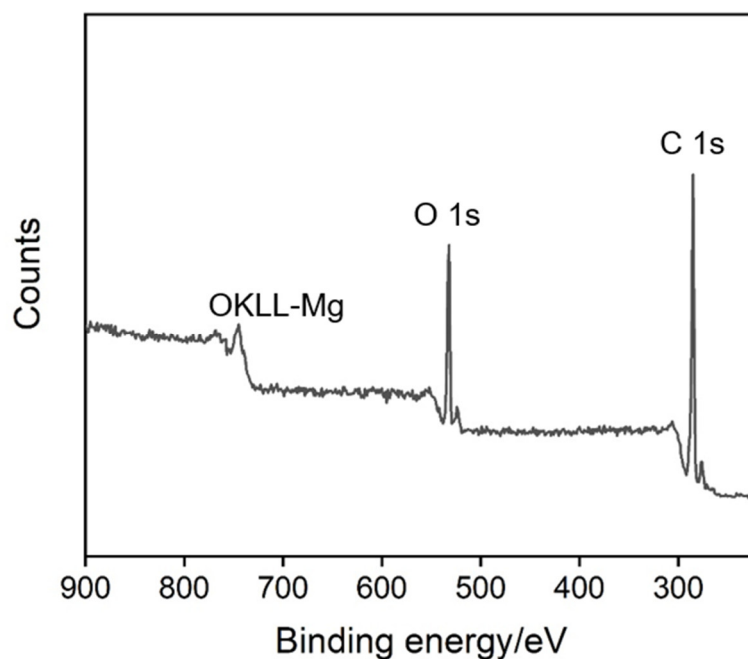

Figure S1. XPS survey spectrum of 3DG.

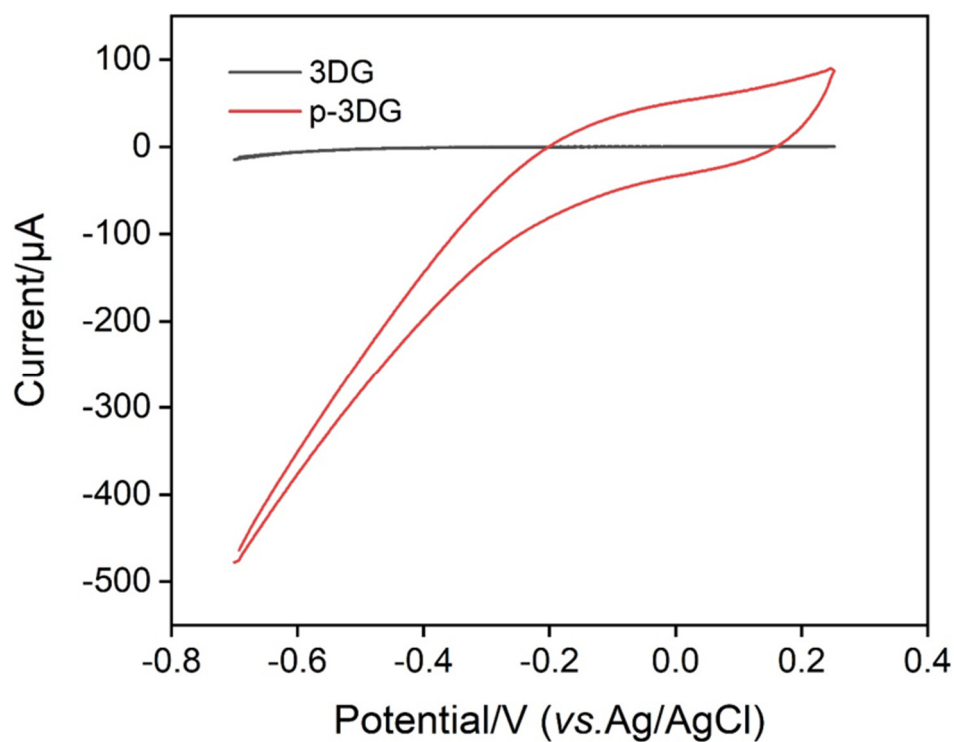

**Figure S2.** Cyclic voltammetry curves obtained on p-3DG or 3DG in 0.1 M PBS solution (pH 7.0). The scan rate was 100 mV/s.

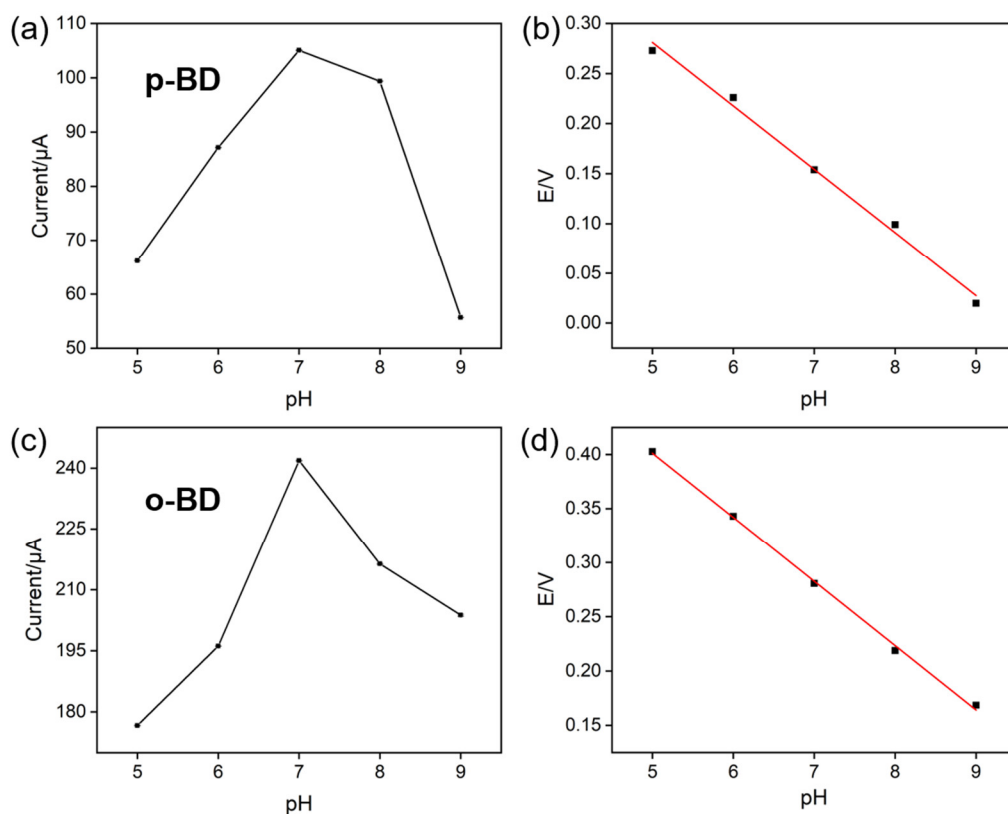

**Figure S3.** The electrochemical oxidation peaks of p-BD (a) or o-BD (c) at different pH. The linear regression line between anodic peak potential of p-BD (b) or o-BD (d) with pH values.
